# Supplementary material
Source: PubMed Central journal article supplement (PMC4377298)

Fold change normalized to TEMRA

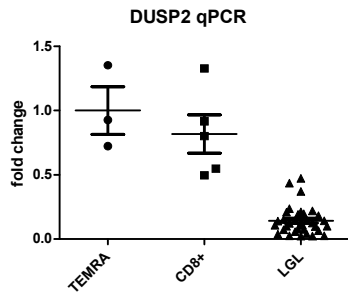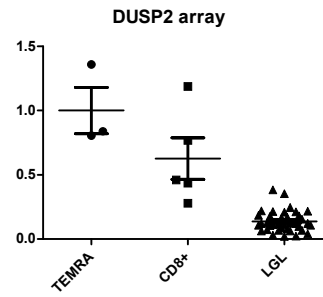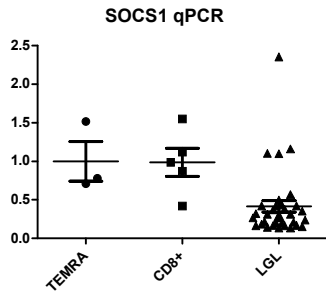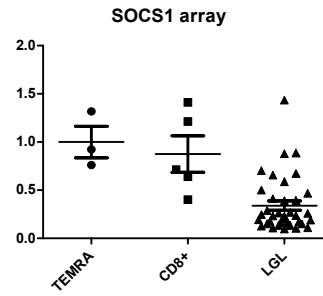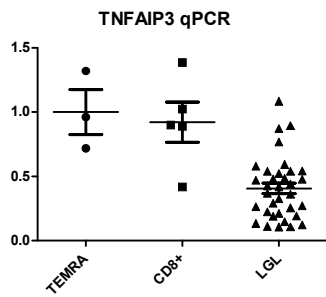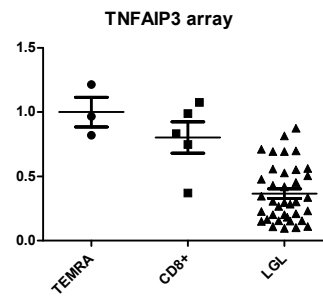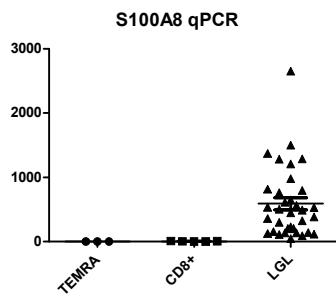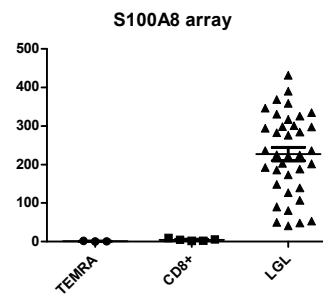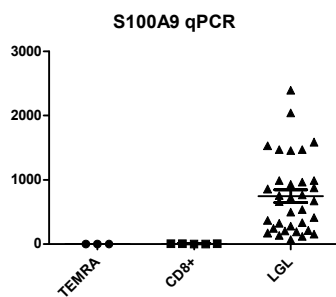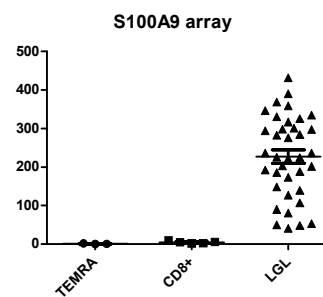

Sample group LGL array n=37, LGL qPCR n=34

Supplement: NIHMS672703-supplement-Suppl_Fig_2.pdf [file NIHMS672703-supplement-Suppl_Fig_2.pdf]
